# Supplementary material
Source: PubMed Central journal article supplement (PMC5321486)
Supplement: NIHMS65121-supplement-Supplemental_material.pdf [file NIHMS65121-supplement-Supplemental_material.pdf]

## SUPPLEMENTAL MATERIAL

### **Methodological factors in determining risk of dementia and cognitive impairment in TIA and stroke: (III) Applicability of short cognitive tests**

Sarah T Pendlebury FRCP DPhil, Stephen P Klaus BMBCh, Ross Thomson BMBCh, Ziyah Mehta DPhil, Rose Wharton MSc, Peter M Rothwell FMedSci for the Oxford Vascular Study

Stroke Prevention Research Unit, Nuffield Department of Clinical Neurosciences, John Radcliffe Hospital, and the University of Oxford

Email: [sarah.pendlebury@ndcn.ox.ac.uk](mailto:sarah.pendlebury@ndcn.ox.ac.uk)

Contents      Supplemental tables I-V

Supplemental Table I. Assessed, testable vs untestable and numbers with a problem with cognitive testing at baseline.

|                                 | Total assessed | Untestable | Testable  | p unadjusted/<br>adjusted | Tested but<br>problem | Tested no<br>problem | p unadjusted/<br>adjusted |
|---------------------------------|----------------|------------|-----------|---------------------------|-----------------------|----------------------|---------------------------|
|                                 | n=1097         | n=262      | n=835     |                           | n=71                  | n=764                |                           |
| <b>Mean/sd age at event</b>     | 74.8/12.1      | 77.9/11.8  | 73.9/12.0 | <0.001                    | 78.7/11.1             | 73.4/12.0            | 0.0004                    |
| <b>Male sex</b>                 | 521 (47)       | 110 (42)   | 411 (49)  | 0.041/0.17                | 35 (49)               | 376 (49)             | 0.99/0.68                 |
| <b>Education (&lt;12 years)</b> | 659 (60)       | 130 (50)   | 529 (63)  | <0.001/<0.001             | 50 (70)               | 479 (63)             | 0.2/0.24                  |
| <b>TIA (vs. stroke)</b>         | 378 (34)       | 47 (18)    | 331 (40)  | <0.001/<0.001             | 13 (18)               | 318 (42)             | <0.001/<0.001             |
| <b>TIA</b>                      | 378 (34)       | 47 (18)    | 331 (40)  | <0.001/<0.001             | 13 (18)               | 318 (42)             | 0.001/<0.001              |
| <b>Ischaemic stroke</b>         | 679 (62)       | 197 (75)   | 482 (58)  |                           | 56 (79)               | 425 (56)             |                           |
| <b>PICH</b>                     | 40 (4)         | 18 (7)     | 22 (3)    |                           | 2 (3)                 | 20 (2)               |                           |
| <b>TIA</b>                      | 378 (35)       | 51 (20)    | 327 (40)  | <0.001/<0.001             | 13 (18)               | 318 (42)             | <0.001/<0.001             |
| <b>Minor Stroke</b>             | 429 (39)       | 58 (22)    | 371 (44)  |                           | 26 (37)               | 345 (45)             |                           |
| <b>Major stroke</b>             | 290 (26)       | 157 (60)   | 133 (16)  |                           | 32 (45)               | 101 (13)             |                           |
| <b>Prior TIA</b>                | 178 (16)       | 44 (17)    | 134 (16)  | 0.78/0.99                 | 9 (13)                | 125 (16)             | 0.42/0.28                 |
| <b>Prior stroke</b>             | 180 (16)       | 49 (19)    | 131 (16)  | 0.25/0.53                 | 15 (21)               | 116 (15)             | 0.19/0.38                 |
| <b>Rankin ≥ 3</b>               | 192/1061 (18)  | 71 (30)    | 121 (15)  | <0.001/<0.001             | 20 (28)               | 101 (13)             | 0.001/0.016               |
| <b>Barthel &lt; 20</b>          | 273/1051 (26)  | 84 (37)    | 189 (23)  | <0.001/0.002              | 29 (41)               | 160 (21)             | <0.001/0.004              |
| <b>Leukoaraiosis</b>            |                |            |           |                           |                       |                      |                           |
| <b>None</b>                     | 526/963 (55)   | 92 (41)    | 434 (59)  | <0.001/0.005              | 30 (46)               | 404 (60)             | 0.1/0.35                  |
| <b>Mild</b>                     | 239 (25)       | 63 (28)    | 176 (24)  |                           | 20 (31)               | 156 (23)             |                           |
| <b>Moderate/Severe</b>          | 198 (21)       | 68 (31)    | 130 (17)  |                           | 15 (23)               | 115 (17)             |                           |
| <b>Pre-stroke dementia</b>      | 69 (6)         | 34 (13)    | 35 (4)    | <0.001/<0.001             | 12 (17)               | 23 (3)               | <0.001/0.008              |
| <b>Post-stroke dementia</b>     | 260 (25)       | 81 (36)    | 179 (22)  | <0.001/0.002              | 26 (44)               | 153 (21)             | <0.001/0.12               |

Supplemental Table II. Assessed, testable vs untestable and numbers with a problem with cognitive testing at 1 month follow-up

|                                 | Total assessed | Untestable | Testable  | p unadjusted/<br>adjusted | Tested but<br>problem | Tested no<br>problem | p unadjusted/<br>adjusted |
|---------------------------------|----------------|------------|-----------|---------------------------|-----------------------|----------------------|---------------------------|
|                                 | n=947          | n=169      | n=778     |                           | n=73                  | n=705                |                           |
| <b>Mean/sd age at event</b>     | 73.8/11.8      | 76.7/11.6  | 73.8/11.8 | 0.003                     | 80.8/9.4              | 73.0/11.8            | <0.001                    |
| <b>Male sex</b>                 | 452 (48)       | 75 (44)    | 377 (48)  | 0.34/0.6                  | 26 (36)               | 351 (50)             | 0.021/0.11                |
| <b>Education (&lt;12 years)</b> | 597 (63)       | 98 (58)    | 499 (64)  | 0.13/0.87                 | 55 (75)               | 444 (63)             | 0.036/0.082               |
| <b>TIA (vs. stroke)</b>         | 347 (37)       | 47(28)     | 300 (39)  | 0.009/0.016               | 14 (19)               | 286 (41)             | <0.001/0.001              |
| <b>TIA</b>                      | 347 (37)       | 47(28)     | 300 (39)  | 0.032/0.082               | 14 (19)               | 286 (41)             | 0.001/0.0027              |
| <b>Ischaemic stroke</b>         | 571 (60)       | 116 (69)   | 455 (58)  |                           | 57 (78)               | 398 (56)             |                           |
| <b>PICH</b>                     | 29 (3)         | 6 (4)      | 23 (3)    |                           | 2 (3)                 | 21 (3)               |                           |
| <b>TIA</b>                      | 347 (37)       | 47(28)     | 300 (39)  | <0.001/<0.001             | 14 (19)               | 286 (41)             | <0.001/<0.001             |
| <b>Minor Stroke</b>             | 396 (42)       | 62 (37)    | 334 (43)  |                           | 25 (34)               | 309 (44)             |                           |
| <b>Major stroke</b>             | 204 (22)       | 60 (36)    | 144 (19)  |                           | 34 (47)               | 110 (16)             |                           |
| <b>Prior TIA</b>                | 155 (16)       | 24 (14)    | 131 (17)  | 0.4/0.29                  | 12 (16)               | 119 (17)             | 0.92/0.59                 |
| <b>Prior stroke</b>             | 155 (16)       | 39 (23)    | 116 (15)  | 0.009/0.021               | 18 (25)               | 98 (14)              | 0.014/0.048               |
| <b>Rankin ≥ 3</b>               | 151/932 (16)   | 53 (33)    | 98 (13)   | <0.001/<0.001             | 22 (31)               | 76 (11)              | <0.001/<0.001             |
| <b>Barthel &lt; 20</b>          | 215/927 (23)   | 57 (36)    | 158 (21)  | <0.001/<0.001             | 28 (39)               | 130 (19)             | <0.001/0.004              |
| <b>Leukoaraiosis</b>            |                |            |           |                           |                       |                      |                           |
| <b>None</b>                     | 476/847 (56)   | 68 (48)    | 408 (58)  | 0.054/0.47                | 28 (40)               | 380 (60)             | 0.005/0.59                |
| <b>Mild</b>                     | 204 (24)       | 37 (26)    | 167 (24)  |                           | 26 (38)               | 141 (22)             |                           |
| <b>Moderate/Severe</b>          | 167 (20)       | 37 (26)    | 130 (18)  |                           | 15 (22)               | 115 (18)             |                           |
| <b>Pre-stroke dementia</b>      | 48 (5)         | 26 (15)    | 22 (3)    | <0.001/<0.001             | 9 (12)                | 13 (2)               | <0.001/<0.001             |
| <b>Post-stroke dementia</b>     | 241 (27)       | 51 (36)    | 190 (25)  | 0.009/0.046               | 33 (52)               | 157 (23)             | <0.001/0.001              |

Supplemental Table III. Assessed, testable vs untestable and numbers with a problem with cognitive testing at 6 month follow-up

|                                 | Total assessed | Untestable | Testable  | p unadjusted/<br>adjusted | Tested but<br>problem | Tested no<br>problem | p unadjusted/<br>adjusted |
|---------------------------------|----------------|------------|-----------|---------------------------|-----------------------|----------------------|---------------------------|
|                                 | n=857          | n=101      | n=756     |                           | n=63                  | n=693                |                           |
| <b>Mean/sd age at event</b>     | 73.3/11.8      | 75.9/11.7  | 73.5/11.8 | 0.054                     | 79.1/10.3             | 73.0/11.8            |                           |
| <b>Male sex</b>                 | 418/857 (49)   | 42 (42)    | 376 (50)  | 0.12/0.020                | 23 (37)               | 353 (51)             | 0.028/0.087               |
| <b>Education (&lt;12 years)</b> | 538 (63)       | 46 (73)    | 443 (64)  | 0.002/0.001               | 46 (73)               | 443 (64)             | 0.15/0.23                 |
| <b>TIA (vs. stroke)</b>         | 326/851 (38)   | 34 (34)    | 292 (39)  | 0.34/0.37                 | 14 (22)               | 278 (40)             | 0.005/0.006               |
| <b>TIA</b>                      | 326 (38)       | 34 (34)    | 292 (39)  | 0.39/0.71                 | 14 (22)               | 278 (40)             | 0.004/0.0042              |
| <b>Ischaemic stroke</b>         | 504 (59)       | 62 (61)    | 442 (58)  |                           | 49 (78)               | 393 (57)             |                           |
| <b>PICH</b>                     | 27 (3)         | 5 (5)      | 22 (3)    |                           | 0                     | 22 (3)               |                           |
| <b>TIA</b>                      | 326/857 (38)   | 34 (34)    | 292 (39)  | <0.001/0.0003             | 14 (22)               | 278 (40)             | <0.001/<0.001             |
| <b>Minor Stroke</b>             | 360 (42)       | 32 (32)    | 328 (43)  |                           | 22 (35)               | 306 (44)             |                           |
| <b>Major stroke</b>             | 171 (20)       | 35 (34)    | 136 (18)  |                           | 27 (43)               | 109 (16)             |                           |
| <b>Prior TIA</b>                | 142/857 (17)   | 14 (14)    | 128 (17)  | 0.44/0.34                 | 10 (16)               | 118 (17)             | 0.82/0.53                 |
| <b>Prior stroke</b>             | 125/857 (15)   | 20 (20)    | 105 (14)  | 0.11/0.16                 | 6 (10)                | 99 (14)              | 0.3/0.16                  |
| <b>Rankin ≥ 3</b>               | 122/841 (15)   | 31 (33)    | 91 (12)   | <0.001/<0.001             | 17 (28)               | 74 (11)              | <0.001/0.002              |
| <b>Barthel &lt; 20</b>          | 183/837 (22)   | 29 (32)    | 154 (21)  | 0.014/0.044               | 22 (36)               | 132 (19)             | 0.002/0.027               |
| <b>Leukoaraiosis</b>            |                |            |           |                           |                       |                      |                           |
| <b>None</b>                     | 436/763 (57)   | 42 (49)    | 394 (58)  | 0.18/0.57                 | 30 (51)               | 364 (59)             | 0.48/0.87                 |
| <b>Mild</b>                     | 182 (24)       | 21 (25)    | 161 (24)  |                           | 17 (29)               | 144 (23)             |                           |
| <b>Moderate/Severe</b>          | 145 (19)       | 22 (26)    | 123 (18)  |                           | 12 (20)               | 111 (18)             |                           |
| <b>Pre-stroke dementia</b>      | 30 (4)         | 16 (16)    | 14 (2)    | <0.001/<0.001             | 3 (5)                 | 11 (2)               | 0.074/0.17                |
| <b>Post-stroke dementia</b>     | 217 (26)       | 41 (48)    | 176 (24)  | <0.001/<0.001             | 25 (42)               | 151 (22)             | 0.001/0.019               |

Supplemental Table IV. Assessed, tested vs untestable and numbers with a problem with cognitive testing at 1 year follow-up.

|                                 | <b>Total assessed</b> | <b>Untestable</b> | <b>Testable</b> | <b>p unadjusted/<br/>adjusted</b> | <b>Tested but<br/>problem</b> | <b>Tested no<br/>problem</b> | <b>p unadjusted/<br/>adjusted</b> |
|---------------------------------|-----------------------|-------------------|-----------------|-----------------------------------|-------------------------------|------------------------------|-----------------------------------|
|                                 | n=792                 | n=97              | n=692           |                                   | n=58                          | n=637                        |                                   |
| <b>Mean/sd age at event</b>     | 73.8 (11.8)           | 76.9/11.6         | 72.7/11.8       | 0.0013                            | 78.2/11.2                     | 72.2/11.7                    | 0.0002                            |
| <b>Male sex</b>                 | 378 (48)              | 37 (38)           | 341 (49)        | 0.044/0.11                        | 21 (36)                       | 520 (50)                     | 0.041/0.11                        |
| <b>Education (&lt;12 years)</b> | 501 (63)              | 51 (53)           | 450 (65)        | 0.02/0.009                        | 45 (78)                       | 405 (64)                     | 0.033/0.062                       |
| <b>TIA (vs. stroke)</b>         | 306 (39)              | 40 (41)           | 266 (38)        | 0.57/0.54                         | 14 (24)                       | 252 (40)                     | 0.021/0.02                        |
| <b>TIA</b>                      | 306 (39)              | 40 (41)           | 266 (38)        | 0.83/0.78                         | 14 (24)                       | 252 (40)                     | 0.019/0.01                        |
| <b>Ischaemic stroke</b>         | 466 (59)              | 55 (57)           | 411 (59)        |                                   | 44 (76)                       | 367 (58)                     |                                   |
| <b>PICH</b>                     | 20 (3)                | 2 (2)             | 18 (3)          |                                   | 0                             | 18 (3)                       |                                   |
| <b>TIA</b>                      | 306 (39)              | 40 (41)           | 266 (38)        | 0.001/<0.001                      | 14 (24)                       | 252 (40)                     | <0.001/<0.001                     |
| <b>Minor Stroke</b>             | 340 (43)              | 28 (29)           | 312 (45)        |                                   | 19 (33)                       | 293 (46)                     |                                   |
| <b>Major stroke</b>             | 146 (18)              | 29 (30)           | 117 (17)        |                                   | 25 (43)                       | 92 (14)                      |                                   |
| <b>Prior TIA</b>                | 129 (16)              | 15 (15)           | 114 (16)        | 0.82/0.59                         | 9(16)                         | 105 (16)                     | 0.85/0.57                         |
| <b>Prior stroke</b>             | 107 (14)              | 17 (18)           | 90 (13)         | 0.22/0.34                         | 6 (10)                        | 84 (13)                      | 0.54/0.38                         |
| <b>Rankin ≥ 3</b>               | 96 (12)               | 25 (28)           | 71 (10)         | <0.001/<0.001                     | 17 (30)                       | 54 (9)                       | <0.001/<0.001                     |
| <b>Barthel &lt; 20</b>          | 152/775 (20)          | 27 (31)           | 125 (18)        | 0.005/0.044                       | 21 (38)                       | 104 (16)                     | <0.001/0.002                      |
| <b>Leukoaraiosis</b>            |                       |                   |                 |                                   |                               |                              |                                   |
| <b>None</b>                     | 424/711 (60)          | 42 (48)           | 382 (61)        | 0.063/0.62                        | 31 (57)                       | 351 (62)                     | 0.84/0.37                         |
| <b>Mild</b>                     | 164 (23)              | 27 (31)           | 137 (22)        |                                   | 13 (24)                       | 124 (22)                     |                                   |
| <b>Moderate/Severe</b>          | 123 (17)              | 18 (21)           | 105 (17)        |                                   | 10 (19)                       | 95 (17)                      |                                   |
| <b>Pre-stroke dementia</b>      | 23 (3)                | 12 (12)           | 11 (2)          | <0.001/<0.001                     | 4 (7)                         | 7 (1)                        | 0.001/0.002                       |
| <b>Post-stroke dementia</b>     | 191 (25)              | 36 (42)           | 155 (23)        | <0.001/0.001                      | 27 (50)                       | 128 (20)                     | <0.001/<0.001                     |

Supplemental Table V. Assessed, tested vs untestable and numbers with a problem with cognitive testing at 5 year follow-up

|                                 | Total assessed | Untestable | Testable  | p unadjusted/<br>adjusted | Tested but<br>problem | Tested no<br>problem | p unadjusted/<br>adjusted |
|---------------------------------|----------------|------------|-----------|---------------------------|-----------------------|----------------------|---------------------------|
|                                 | n=567          | n=95       | n=472     |                           | n=63                  | n=409                |                           |
| <b>Mean/sd age at event</b>     | 75.1 (11.57)   | 74.0/11.6  | 69.8/11.5 | 0.0012                    | 75.4/11.1             | 69.0/11.3            | <0.001                    |
| <b>Male sex</b>                 | 279 (49)       | 42 (44)    | 237 (50)  | 0.29/0.53                 | 32 (51)               | 205 (50)             | 0.92/0.53                 |
| <b>Education (&lt;12 years)</b> | 359 (63)       | 55 (58)    | 304 (64)  | 0.23/0.10                 | 47 (75)               | 257 (63)             | 0.07/0.21                 |
| <b>TIA (vs. stroke)</b>         | 236 (42)       | 46 (48)    | 190 (40)  | 0.14/0.13                 | 20 (32)               | 170 (42)             | 0.14/0.14                 |
| <b>TIA</b>                      | 236 (42)       | 46 (48)    | 190 (40)  | 0.21/0.19                 | 20 (32)               | 170 (42)             | 0.24/0.28                 |
| <b>Ischaemic stroke</b>         | 314 (55)       | 45 (47)    | 269 (57)  |                           | 42 (67)               | 227 (56)             |                           |
| <b>PICH</b>                     | 17 (3)         | 4 (4)      | 13 (3)    |                           | 1 (2)                 | 12 (3)               |                           |
| <b>TIA</b>                      | 236 (42)       | 46 (48)    | 190 (40)  | <0.001/<0.001             | 20 (32)               | 170 (42)             | 0.004/0.01                |
| <b>Minor Stroke</b>             | 240 (42)       | 23 (24)    | 217 (46)  |                           | 26 (41)               | 191 (47)             |                           |
| <b>Major stroke</b>             | 91 (16)        | 26 (28)    | 65 (14)   |                           | 17 (27)               | 48 (12)              |                           |
| <b>Prior TIA</b>                | 84 (15)        | 13 (14)    | 71 (15)   | 0.73/0.52                 | 9 (14)                | 62 (15)              | 0.86/0.56                 |
| <b>Prior stroke</b>             | 72 (13)        | 13 (14)    | 59 (12)   | 0.75/0.97                 | 8 (13)                | 51 (12)              | 0.96/0.78                 |
| <b>Rankin ≥ 3</b>               | 40 (7)         | 13 (15)    | 27 (6)    | 0.003/0.008               | 6 (10)                | 21 (5)               | 0.15/0.31                 |
| <b>Barthel &lt; 20</b>          | 83/555 (15)    | 13 (15)    | 70 (15)   | 0.96/0.62                 | 15 (25)               | 55 (13)              | 0.023/0.16                |
| <b>Leukoaraiosis</b>            |                |            |           |                           |                       |                      |                           |
| <b>None</b>                     | 326/501 (65)   | 55 (63)    | 271 (65)  | 0.78/0.45                 | 27 (48)               | 244 (68)             | 0.008/0.26                |
| <b>Mild</b>                     | 101 (20)       | 17 (20)    | 84 (20)   |                           | 15 (27)               | 69 (19)              |                           |
| <b>Moderate/Severe</b>          | 74 (15)        | 15 (17)    | 59 (14)   |                           | 14 (25)               | 45 (13)              |                           |
| <b>Pre-stroke dementia</b>      | 10 (2)         | 7 (70)     | 3 (1)     | <0.001/<0.001             | 1 (2)                 | 2 (1)                | 0.31/0.40                 |
| <b>Post-stroke dementia</b>     | 87 (16)        | 29 (33)    | 58 (12)   | <0.001/<0.001             | 21 (34)               | 37 (9)               | <0.001/<0.001             |
